# Supplementary material
Source: publisher figshare collection journal article supplement (https://frontiersin.figshare.com/ndownloader/files/34857660)
Supplement: Supplementary file [file 34857660]

Supplemental Figure 1. Location and habitat examples for immature and adult mosquito collections made near Hayward, Wisconsin, U.S.A. during 2018 and 2019. The figure map below was produced using QGIS (55).

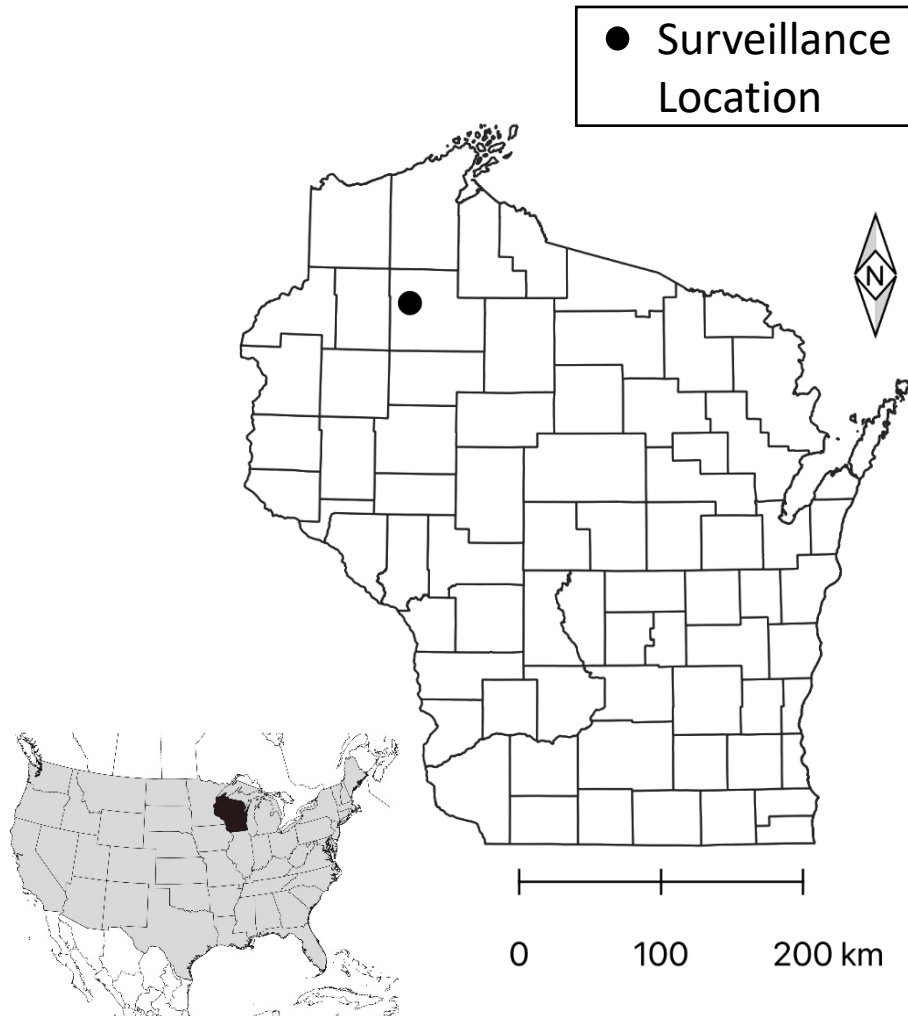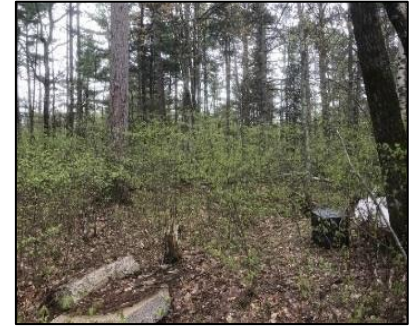

Adult mosquitoes were collected using CDC light, BG Sentinel traps, and resting boxes in this forest habitat.

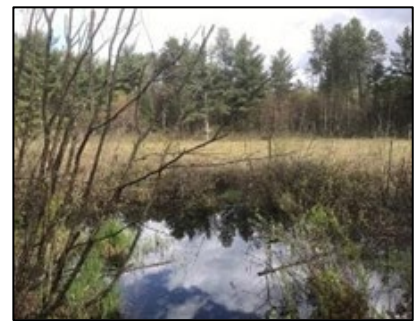

Immature and adult mosquitoes were collected from permanent marsh habitat.

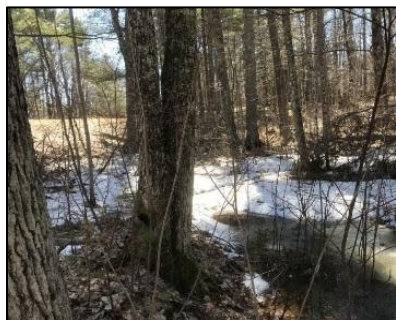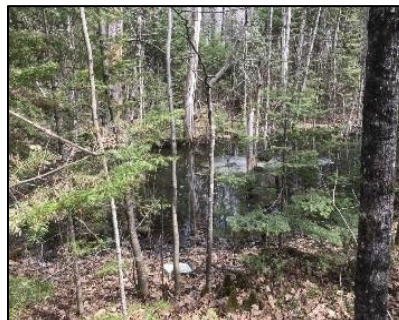

Immature and adult mosquitoes were collected from these ephemeral pools.
